# Supplementary material for: Donor-Derived Hereditary Renal Hypouricemia
Source: PubMed Central journal article supplement — Kidney Int Rep. 2024 Apr 24;9(6):1923–4. doi: 10.1016/j.ekir.2024.04.040 (PMC11184320; doi:10.1016/j.ekir.2024.04.040), 2024-04-24
Supplement: mmc1.pdf [file mmc1.pdf]

## Supplement

**Table S1. Whole exome sequencing report of donor and patient**

### Donor

| Gene (Transcript) | Location | Variant                    | Zygoty                       | Disease (OMIM)                     | Inheritance         | Classification                              |
|-------------------|----------|----------------------------|------------------------------|------------------------------------|---------------------|---------------------------------------------|
| SLC2A9            | Exon 8   | c.1004T>A<br>(p.Ile335Asn) | Likely compound Heterozygous | Renal hypouricemia-2 (OMIM#612076) | Autosomal recessive | Uncertain significance (PM2, PP3)           |
|                   | Exon 9   | c.1138C>T<br>(p.Arg380Trp) |                              |                                    |                     | <b>Pathogenic</b> (PS4, PS3, PM2, PP3, PP5) |

### Patient

| Gene (Transcript) | Location | Variant                    | Zygoty       | Disease (OMIM)                                           | Inheritance                             | Classification                    |
|-------------------|----------|----------------------------|--------------|----------------------------------------------------------|-----------------------------------------|-----------------------------------|
| SLC2A9            | Exon 8   | c.1004T>A<br>(p.Ile335Asn) | Heterozygous | Renal hypouricemia-2 (OMIM#612076)                       | Autosomal dominant; Autosomal recessive | Uncertain significance (PM2, PP3) |
| FN1               | Exon 14  | c.1944A>T<br>(p.Lys648Asn) | Heterozygous | Glomerulopathy with fibronectin deposits 2 (OMIM#601894) | Autosomal dominant                      | Uncertain significance (PM2, PP3) |

**Figure S1. Pedigree chart**

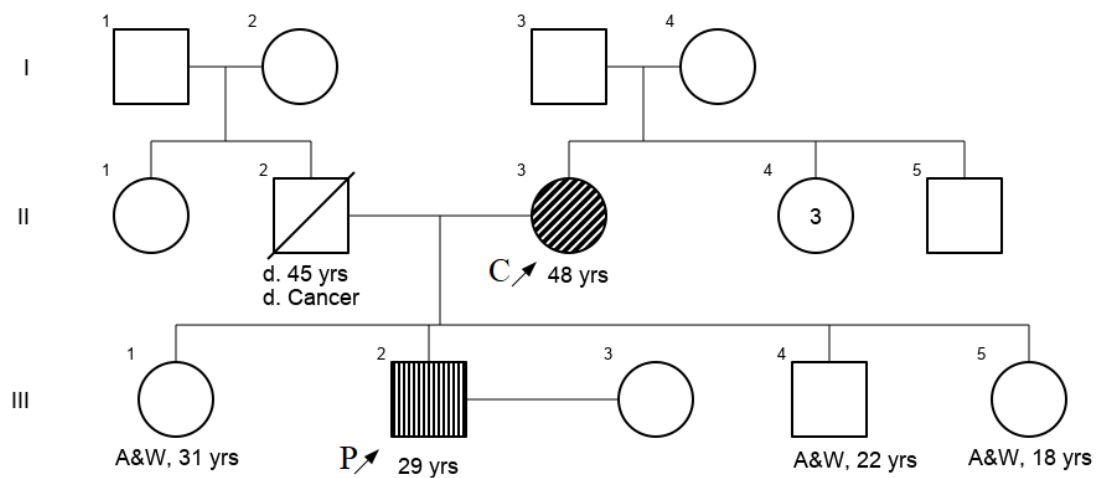

**LEGEND**

- ||| Chronic kidney disease
- /// Renal hypouricemia, type 2

**Supplementary references**

- S1. Matsuo H, Chiba T, Nagamori S, Nakayama A, Domoto H, Phetdee K, et al. Mutations in Glucose Transporter 9 Gene SLC2A9 Cause Renal Hypouricemia. *Am J Hum Genet.* 2008 Dec;83(6):744–51.
- S2. Chiba T, Matsuo H, Nagamori S, Nakayama A, Kawamura Y, Shimizu S, et al. Identification of a Hypouricemia Patient with SLC2A9 R380W, A Pathogenic Mutation for Renal Hypouricemia Type 2. *Nucleosides Nucleotides Nucleic Acids.* 2014 Apr 4;33(4–6):261–5.
